# Supplementary material for: Microglia involvement in the schizophrenia occurrence in male offspring with maternal dexamethasone exposure
Source: Research Square preprint supplement (doi:10.21203/rs.3.rs-1676907/v1), 2022-05-25
Supplement: Supplementary file 1 [file eea4de51ebcf0b69f659152e.docx]

**Supplementary Table 1. Primer sequence**

Mouse

|  | Forward (5’-3’) | Reverse (5’-3’) |
| --- | --- | --- |
| GAPDH | CGACCTTCACCATTTTGTCTACA | GCTTAAGAGACAGCCGCATCT |
| Cd200r | AGGAGGATGAAATGCAGCCTTA | TGCCTCCACCTTAGTCACAGTATC |
| Trem2 | TGGGACCTCTCCACCAGTT | GTGGTGTTGAGGGCTTGG |
| Cx3cr1 | TGGCCCAGCAAGCATAG | CATGTCTGCTACCCTCACAAA |
| Il1b | GGCTGGACTGTTTCTAATGC | ATGGTTTCTTGTGACCCTGA |
| Il6 | GCAAGTGCATCATCGTTGTTCATAC | CCACTTCACAAGTCGGAGGCTTA |
| Tnfa | GAGTCCGGGCAGGTCTACTTT | CAGGTCACTGTCCCAGCATCT |
| Il10 | GCAGCTCTAGGAGCATGTGG | ACAGCCGGGAAGACAATAACT |
| Arg1 | GGAATCTGCATGGGCAACCTGTGT | AGGGTCTACGTCTCGCAAGCCA |
| Ido | GGCTTCTTCCTCGTCTCTCTATTG | TGACGCTCTACTGCACTGGATAC |
| Kmo | CCTGTAGAGGACAATATAGGATCAACAA | GCAAGCCCCATCTACTGCAT |
| C1qa | Qiagen PPM24525E | |
| C3ar1 | Qiagen PPM04821A | |

**Supplementary Table 2. Statistics of two-way ANOVA in behavior assessment in 5W/10W and Orx group.**

| **5W Behavior - PPI** | | | | | |
| --- | --- | --- | --- | --- | --- |
|  | **SS** (Sum-of-squares) | **Df**  (Degrees of freedom) | **MS**  (Mean squares) | **F**  (F ratio) | **p-value** |
| Treatment (Veh vs. PN-DEX) | 53.89 | 1 | 53.89 | 0.1386 | P=0.7104 |
| Decibel (3 dB, 6 dB, 12 dB) | 1002 | 2 | 500.8 | 1.288 | P=0.2799 |
| Interaction  Treatment x Decibel | 3476 | 6 | 579.3 | 2.273 | P=0.0388 |

| **10W Behavior - PPI** | | | | | |
| --- | --- | --- | --- | --- | --- |
|  | **SS** (Sum-of-squares) | **Df**  (Degrees of freedom) | **MS**  (Mean squares) | **F**  (F ratio) | **p-value** |
| Treatment * (Veh vs. PN-DEX) | 1417 | 1 | 1417 | 5.898 | P=0.0162 |
| Decibel **** (3 dB, 6 dB, 12 dB) | 41236 | 5 | 8247 | 34.33 | P<0.0001 |
| Interaction *  Treatment x Decibel | 2815 | 5 | 563 | 2.343 | P=0.0436 |
| **10W Behavior - LI** | | | | | |
| Treatment  (Veh vs. PN-DEX) | 89.23 | 1 | 89.23 | 0.5127 | P=0.4804 |
| Conditioning (NPE vs. PE) | 393 | 1 | 393 | 2.258 | P=0.1449 |
| Interaction **  Treatment x Conditioning | 1448 | 1 | 1448 | 8.319 | P=0.0078 |
| **10W Behavior – Locomotor activity** | | | | | |
| Treatment *  (Veh vs. PN-DEX) | 90715093 | 1 | 90715093 | 6.591 | P=0.0200 |
| Time **** (1 min. bins) | 132185617 | 23 | 5747201 | 16.79 | P<0.0001 |
| Interaction ****  Treatment x Time | 27350861 | 23 | 1189168 | 3.475 | P<0.0001 |

| **Orx Behavior - PPI** | | | | | |
| --- | --- | --- | --- | --- | --- |
|  | **SS** (Sum-of-squares) | **Df**  (Degrees of freedom) | **MS**  (Mean squares) | **F**  (F ratio) | **p-value** |
| Treatment **** | 7954 | 3 | 2651 | 10.40 | P<0.0001 |
| Decibel **** | 5763 | 2 | 2882 | 11.31 | P<0.0001 |
| Interaction *  Treatment x Decibel | 311.2 | 2 | 155.6 | 0.4002 | P=0.6712 |

**Supplementary Table 3. Statistics of two-way ANOVA in microglia morphology analysis.**

| **mPFC – Soma size** | | | | | |
| --- | --- | --- | --- | --- | --- |
|  | **SS** (Sum-of-squares) | **Df**  (Degrees of freedom) | **MS**  (Mean squares) | **F**  (F ratio) | **p-value** |
| Treatment  (Veh vs. PN-DEX) | 6210 | 1 | 6210 | 74.66 | P<0.0001 |
| Timepoint  (5W vs. 10W) | 1904 | 1 | 1904 | 22.89 | P<0.0001 |
| Interaction  Treatment x Timepoint | 3269 | 1 | 3269 | 39.3 | P<0.0001 |
| **mPFC – Endpoint** | | | | | |
| Treatment  (Veh vs. PN-DEX) | 580.1 | 1 | 580.1 | 14 | P=0.0013 |
| Timepoint  (5W vs. 10W) | 377.3 | 1 | 377.3 | 9.107 | P=0.0068 |
| Interaction **  Treatment x Timepoint | 506.7 | 1 | 506.7 | 12.23 | P=0.0023 |
| **mPFC – Average branch length** | | | | | |
| Treatment  (Veh vs. PN-DEX) | 94.09 | 1 | 94.09 | 8.922 | P=0.0073 |
| Timepoint *** (5W vs. 10W) | 137.4 | 1 | 137.4 | 13.02 | P=0.0018 |
| Interaction  Treatment x Timepoint | 12.48 | 1 | 12.48 | 1.183 | P=0.2896 |
| **mPFC – Sholl analysis** | | | | | |
| Treatment **** (Veh vs. PN-DEX) | 1117 | 3 | 372.3 | 20.04 | P<0.0001 |
| Timepoint **** (5W vs. 10W) | 20714 | 9 | 2302 | 123.9 | P<0.0001 |
| Interaction ***  Treatment x Timepoint | 1039 | 27 | 38.47 | 2.071 | P=0.0013 |
| **mPFC – Mean intersections** | | | | | |
| Treatment  (Veh vs. PN-DEX) | 27.45 | 1 | 27.45 | 0.5374 | P=0.4641 |
| Timepoint  (5W vs. 10W) | 146.2 | 1 | 146.2 | 2.863 | P=0.0917 |
| Interaction *  Treatment x Timepoint | 27.45 | 1 | 27.45 | 0.5374 | P=0.4641 |

| **STR – Soma size** | | | | | |
| --- | --- | --- | --- | --- | --- |
|  | **SS** (Sum-of-squares) | **Df**  (Degrees of freedom) | **MS**  (Mean squares) | **F**  (F ratio) | **p-value** |
| Treatment  (Veh vs. PN-DEX) | 105.2 | 1 | 105.2 | 1.651 | P=0.1331 |
| Timepoint  (5W vs. 10W) | 151.6 | 1 | 151.6 | 2.379 | P=0.1233 |
| Interaction  Treatment x Timepoint | 144 | 1 | 144 | 2.26 | P=0.1991 |
| **STR – Endpoint** | | | | | |
| Treatment  (Veh vs. PN-DEX) | 69.39 | 1 | 69.39 | 3.553 | P=0.0741 |
| Timepoint  (5W vs. 10W) | 13.78 | 1 | 13.78 | 0.7056 | P=0.4109 |
| Interaction **  Treatment x Timepoint | 188.1 | 1 | 188.1 | 9.632 | P=0.0056 |
| **STR – Average branch length** | | | | | |
| Treatment  (Veh vs. PN-DEX) | 30.57 | 1 | 30.57 | 3.257 | P=0.0862 |
| Timepoint *** (5W vs. 10W) | 174.7 | 1 | 174.7 | 18.62 | P=0.0003 |
| Interaction  Treatment x Timepoint | 29.38 | 1 | 29.38 | 3.13 | P=0.0921 |
| **STR – Sholl analysis** | | | | | |
| Treatment **** (Veh vs. PN-DEX) | 436.2 | 3 | 145.4 | 10.29 | P<0.0001 |
| Timepoint **** (5W vs. 10W) | 10415 | 7 | 1488 | 105.3 | P<0.0001 |
| Interaction ***  Treatment x Timepoint | 717.7 | 21 | 34.18 | 2.418 | P=0.0006 |
| **STR – Mean intersections** | | | | | |
| Treatment  (Veh vs. PN-DEX) | 11.35 | 1 | 11.35 | 2.53 | P=0.1186 |
| Timepoint  (5W vs. 10W) | 17.96 | 1 | 17.96 | 4.002 | P=0.0514 |
| Interaction *  Treatment x Timepoint | 26.03 | 1 | 26.03 | 5.802 | P=0.0201 |


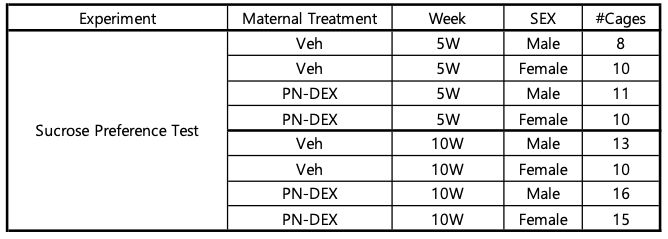

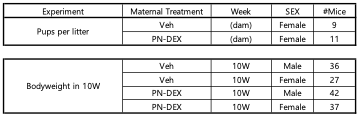
**Supplementary Table 4. The number of mice used in behavior assessment.**


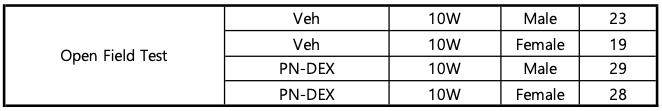

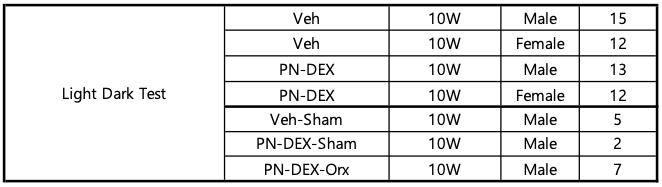

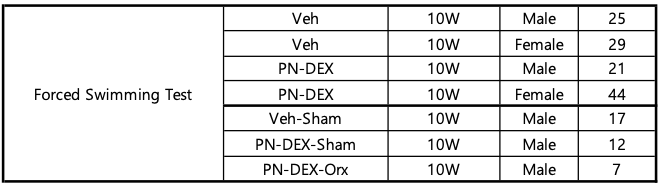

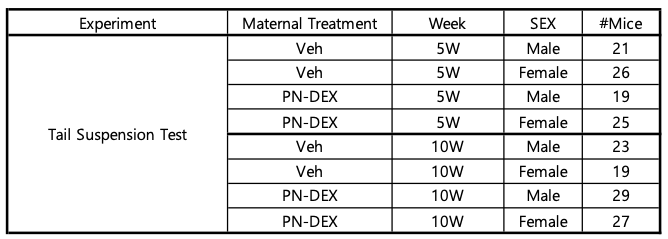


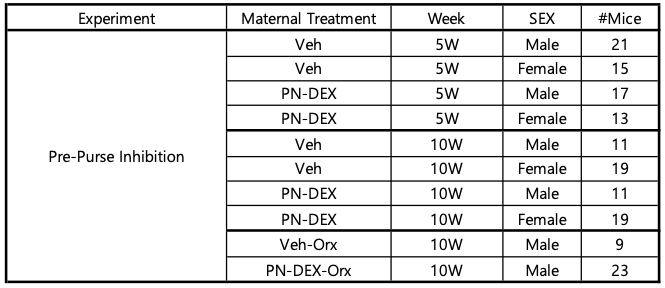


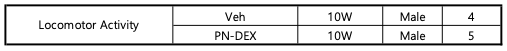


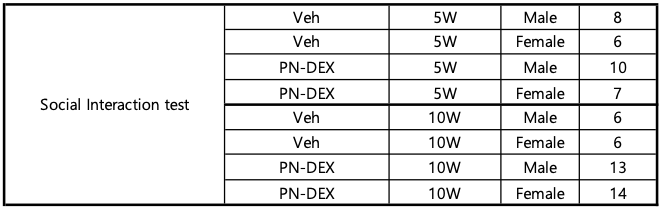


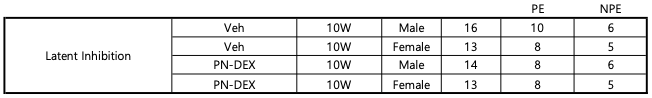


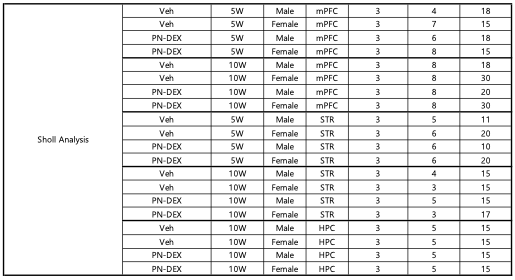

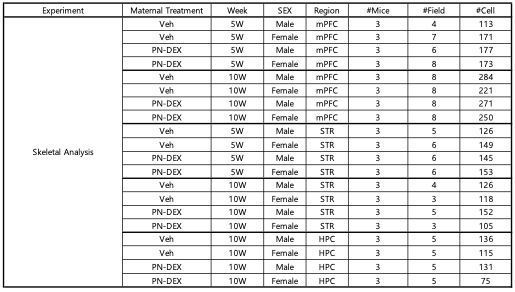
**Supplementary Table 5. The number of mice used in molecular works.**


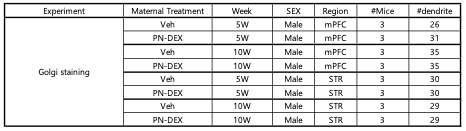

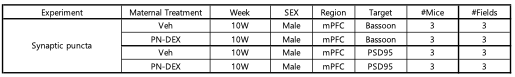

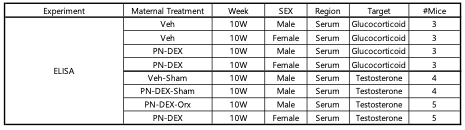

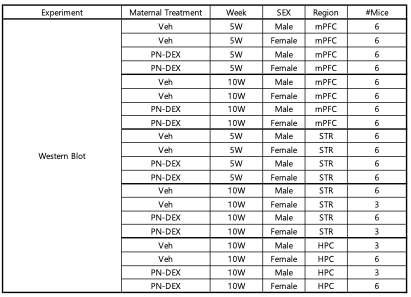

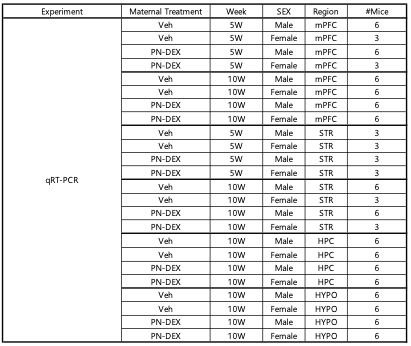


**
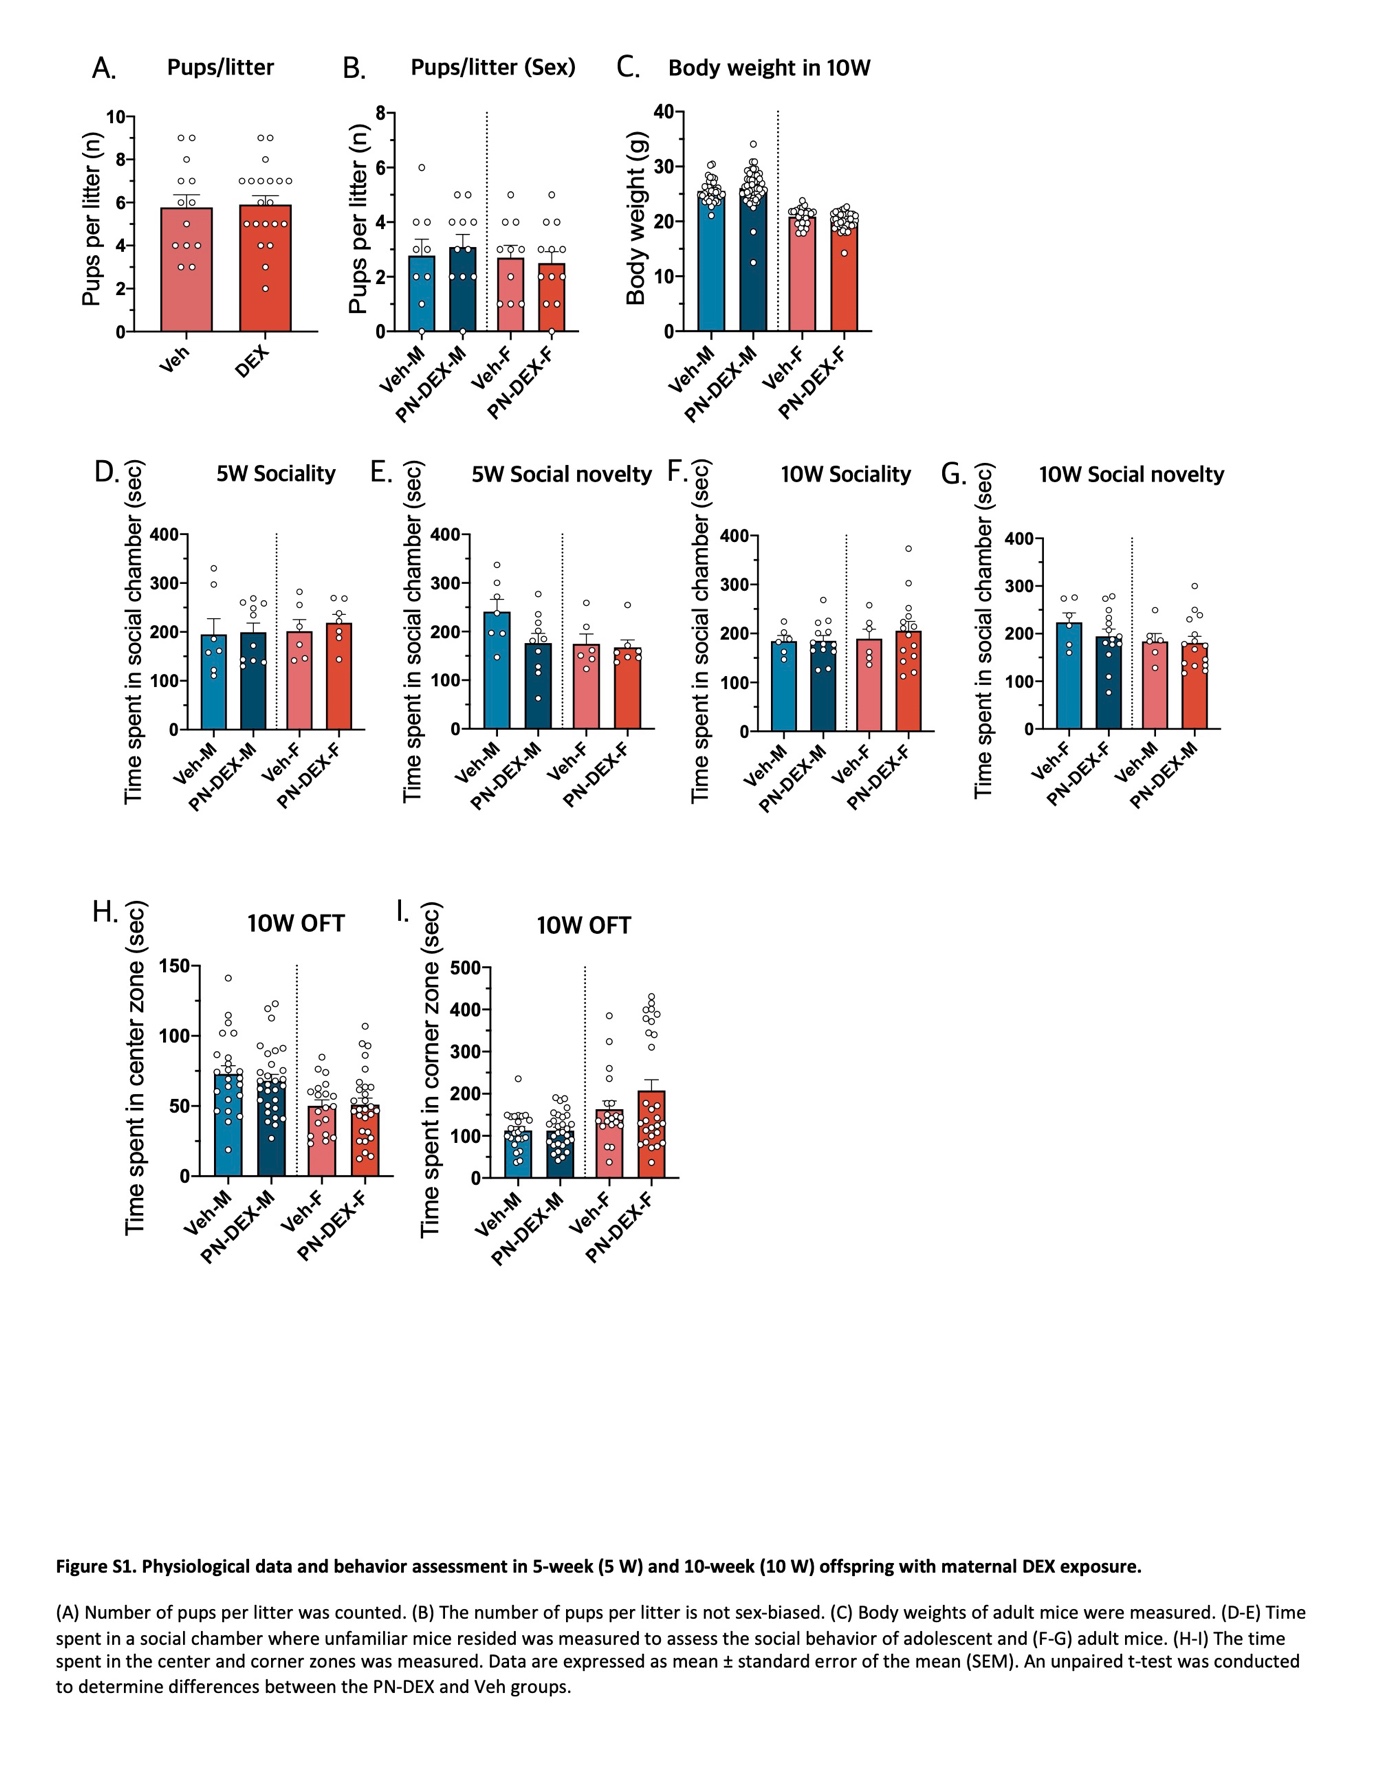
**

**Supplementary figure 1. Physiological data and behavior assessment in 5-week (5 W) and 10-week (10 W) offspring with maternal DEX exposure.**

(A) Number of pups per litter was counted. (B) The number of pups per litter is not sex-biased. (C) Body weights of adult mice were measured. (D-E) Time spent in a social chamber where unfamiliar mice resided was measured to assess the social behavior of adolescent and (F-G) adult mice. (H-I) The time spent in the center and corner zones was measured. Data are expressed as mean ± standard error of the mean (SEM). An unpaired t-test was conducted to determine differences between the PN-DEX and Veh groups.


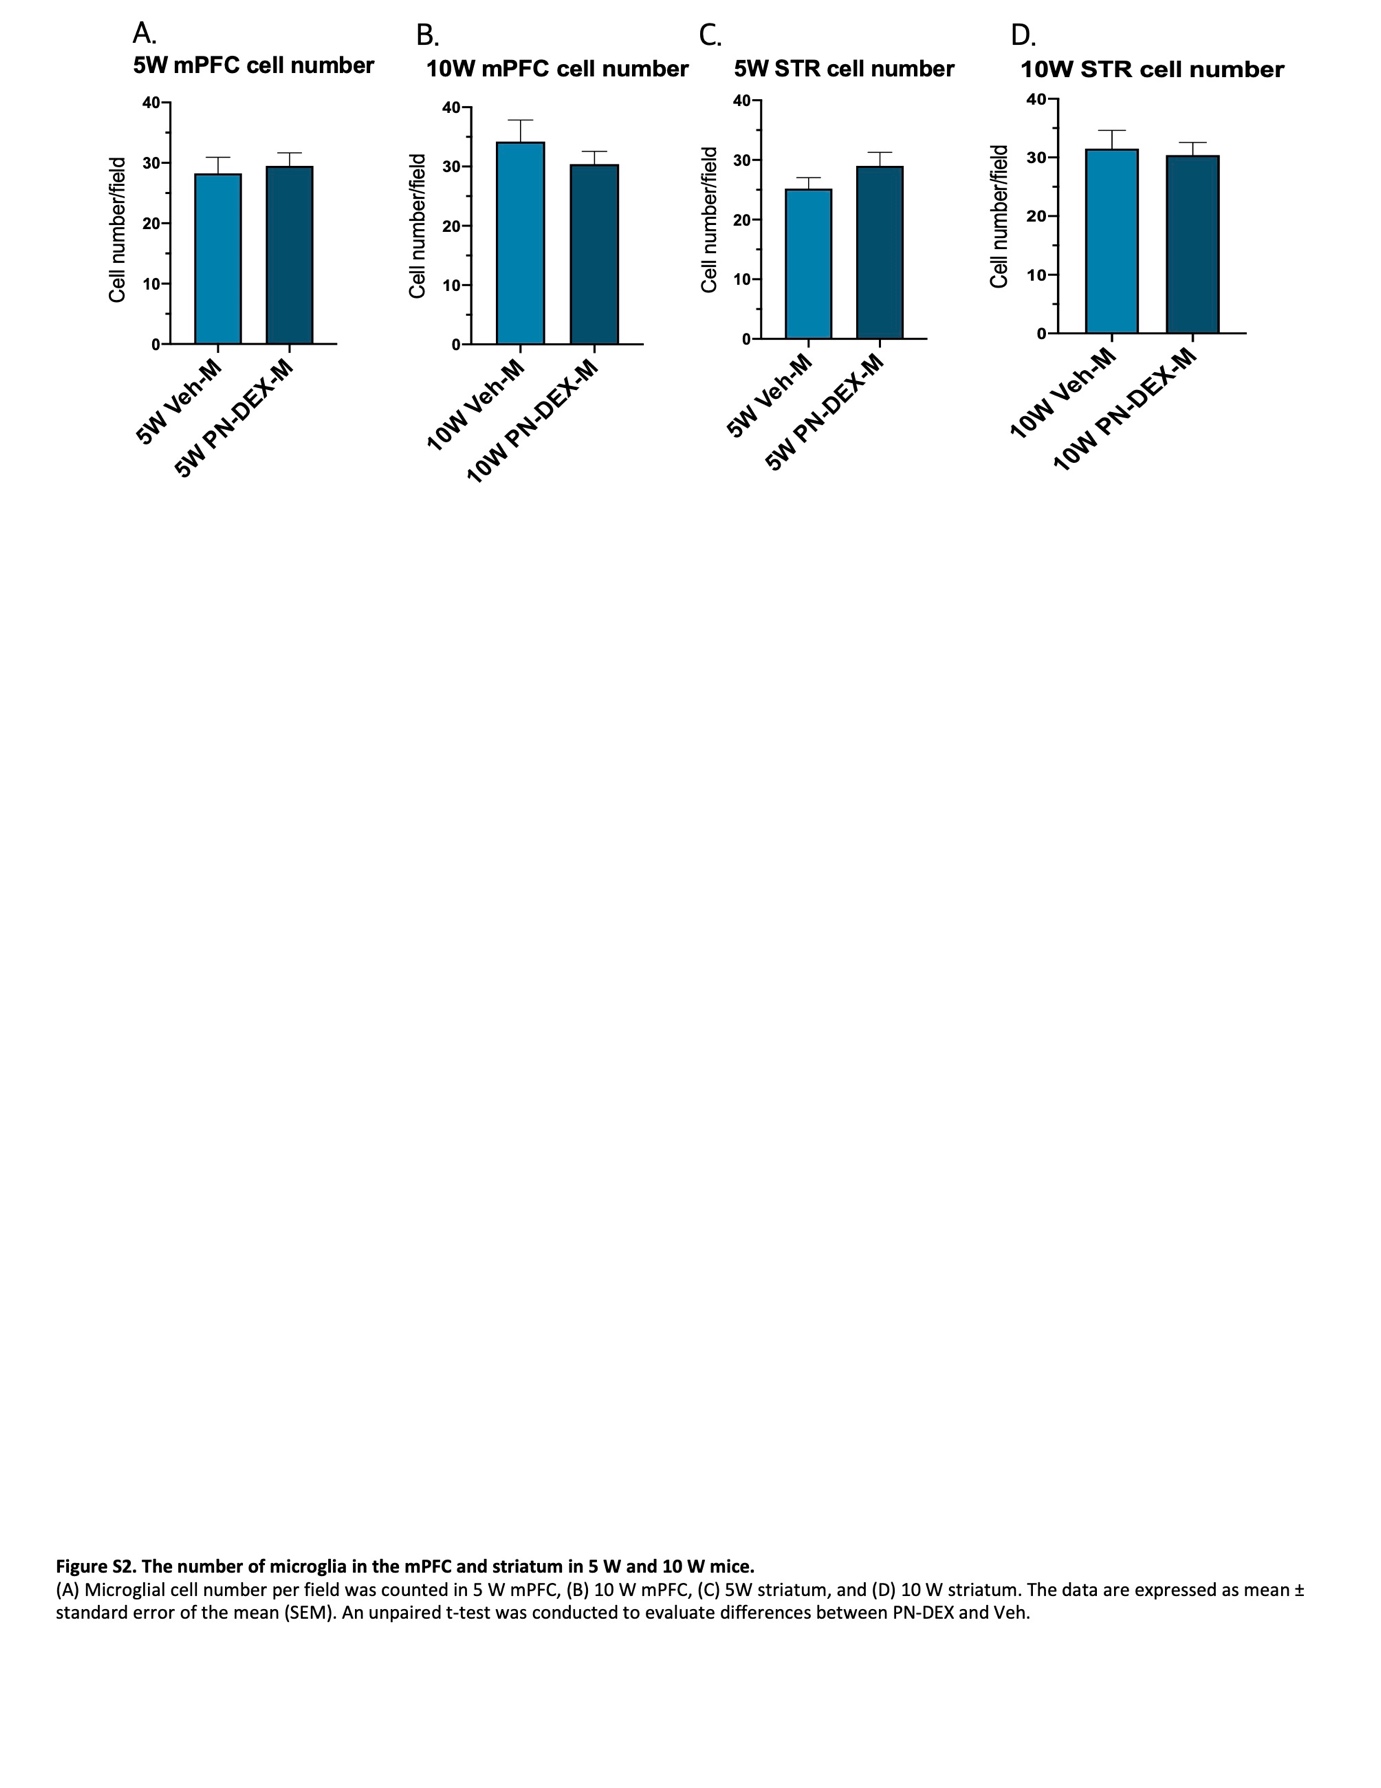


**Supplementary figure 2. The number of microglia in the mPFC and striatum in 5 W and 10 W mice.**

(A) Microglial cell number per field was counted in 5 W mPFC, (B) 10 W mPFC, (C) 5W striatum, and (D) 10 W striatum. The data are expressed as mean ± standard error of the mean (SEM). An unpaired t-test was conducted to evaluate differences between PN-DEX and Veh.


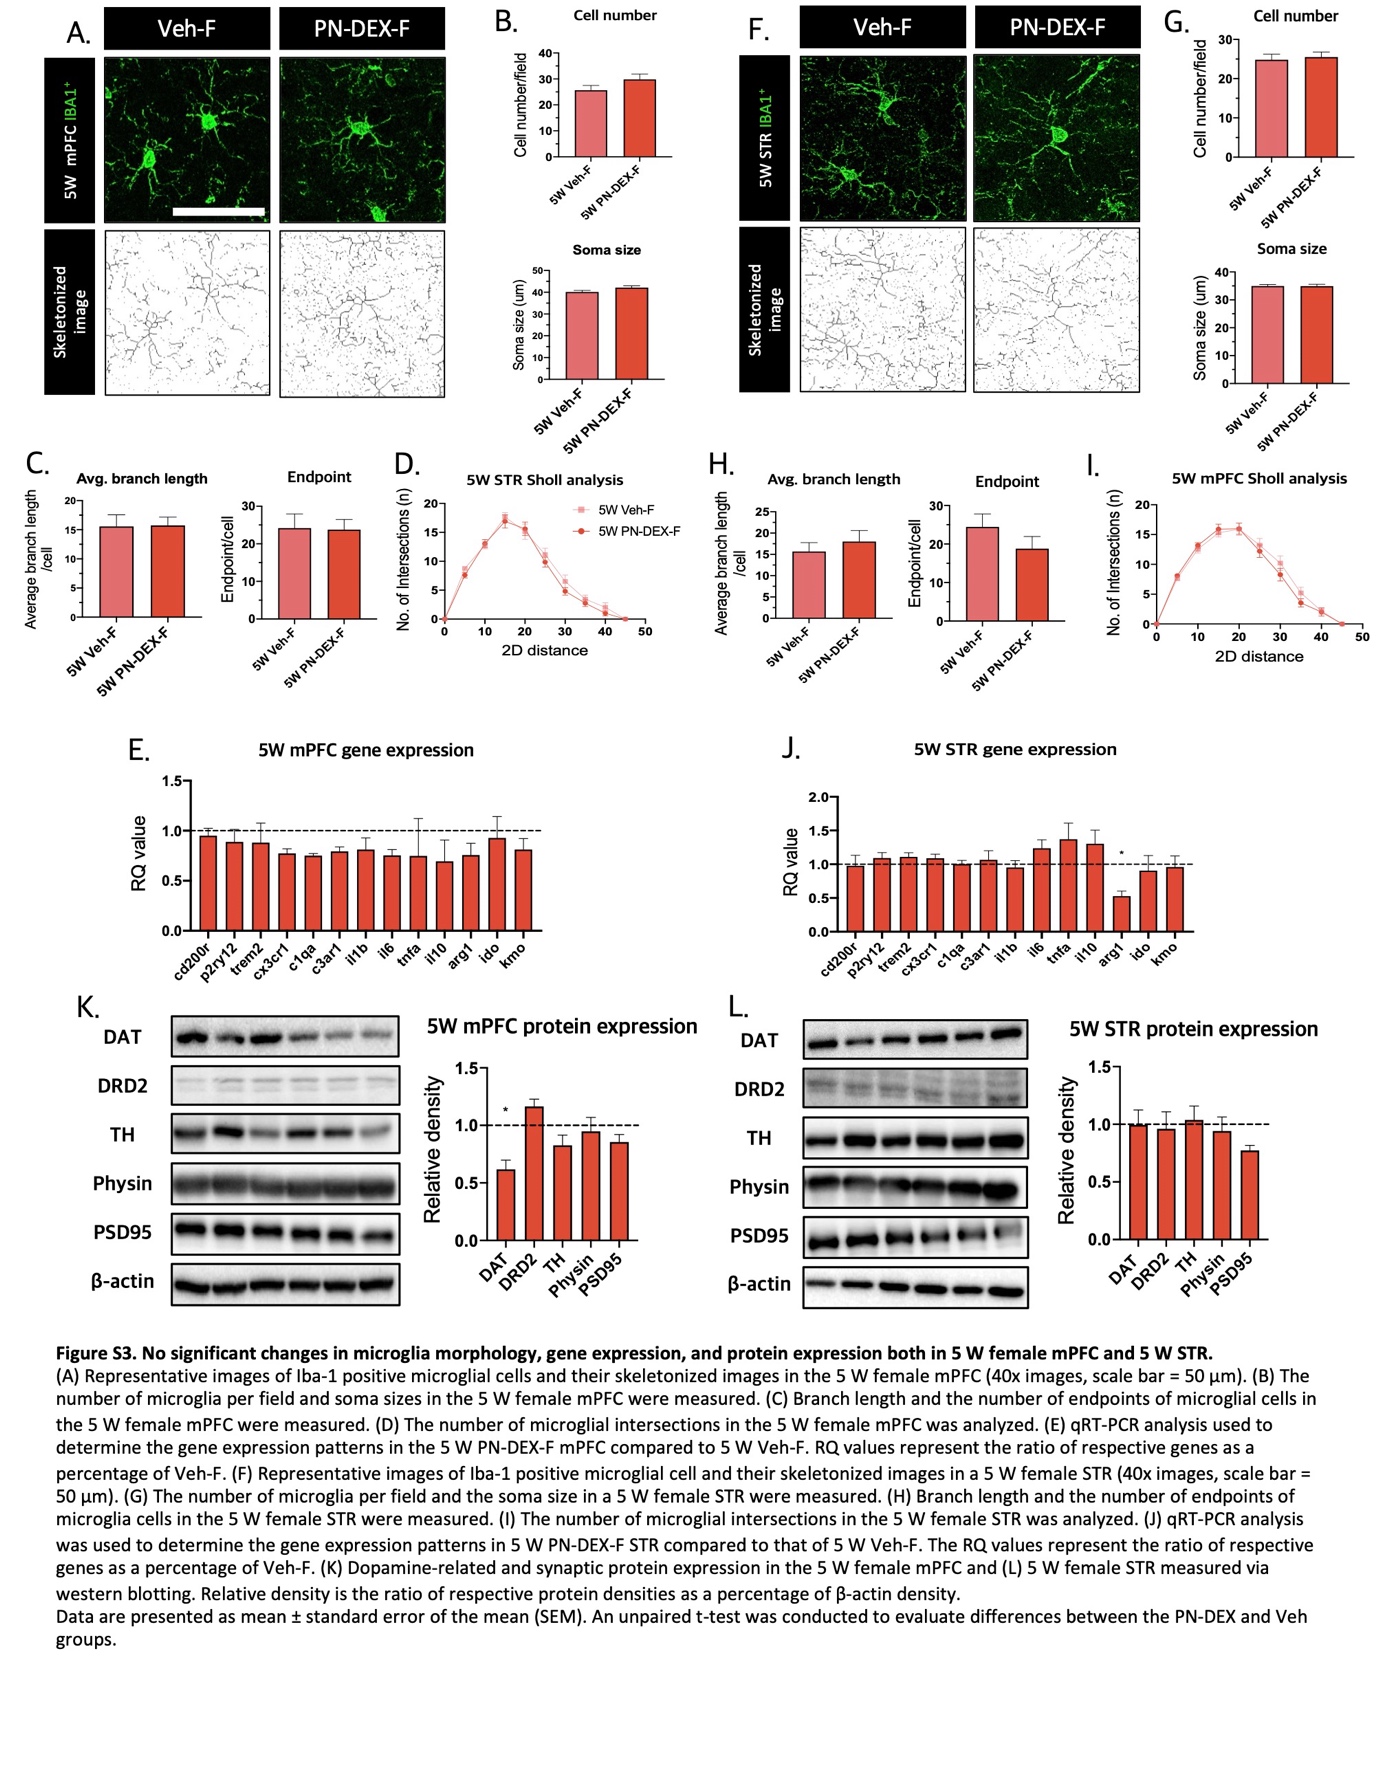


**Supplementary figure 3. No significant changes in microglia morphology, gene expression, and protein expression both in 5 W female mPFC and 5 W STR.**

(A) Representative images of Iba-1 positive microglial cells and their skeletonized images in the 5 W female mPFC (40x images, scale bar = 50 µm). (B) The number of microglia per field and soma sizes in the 5 W female mPFC were measured. (C) Branch length and the number of endpoints of microglial cells in the 5 W female mPFC were measured. (D) The number of microglial intersections in the 5 W female mPFC was analyzed. (E) qRT-PCR analysis used to determine the gene expression patterns in the 5 W PN-DEX-F mPFC compared to 5 W Veh-F. RQ values represent the ratio of respective genes as a percentage of Veh-F. (F) Representative images of Iba-1 positive microglial cell and their skeletonized images in a 5 W female STR (40x images, scale bar = 50 µm). (G) The number of microglia per field and the soma size in a 5 W female STR were measured. (H) Branch length and the number of endpoints of microglia cells in the 5 W female STR were measured. (I) The number of microglial intersections in the 5 W female STR was analyzed. (J) qRT-PCR analysis was used to determine the gene expression patterns in 5 W PN-DEX-F STR compared to that of 5 W Veh-F. The RQ values represent the ratio of respective genes as a percentage of Veh-F. (K) Dopamine-related and synaptic protein expression in the 5 W female mPFC and (L) 5 W female STR measured via western blotting. Relative density is the ratio of respective protein densities as a percentage of β-actin density.

Data are presented as mean ± standard error of the mean (SEM). An unpaired t-test was conducted to evaluate differences between the PN-DEX and Veh groups.


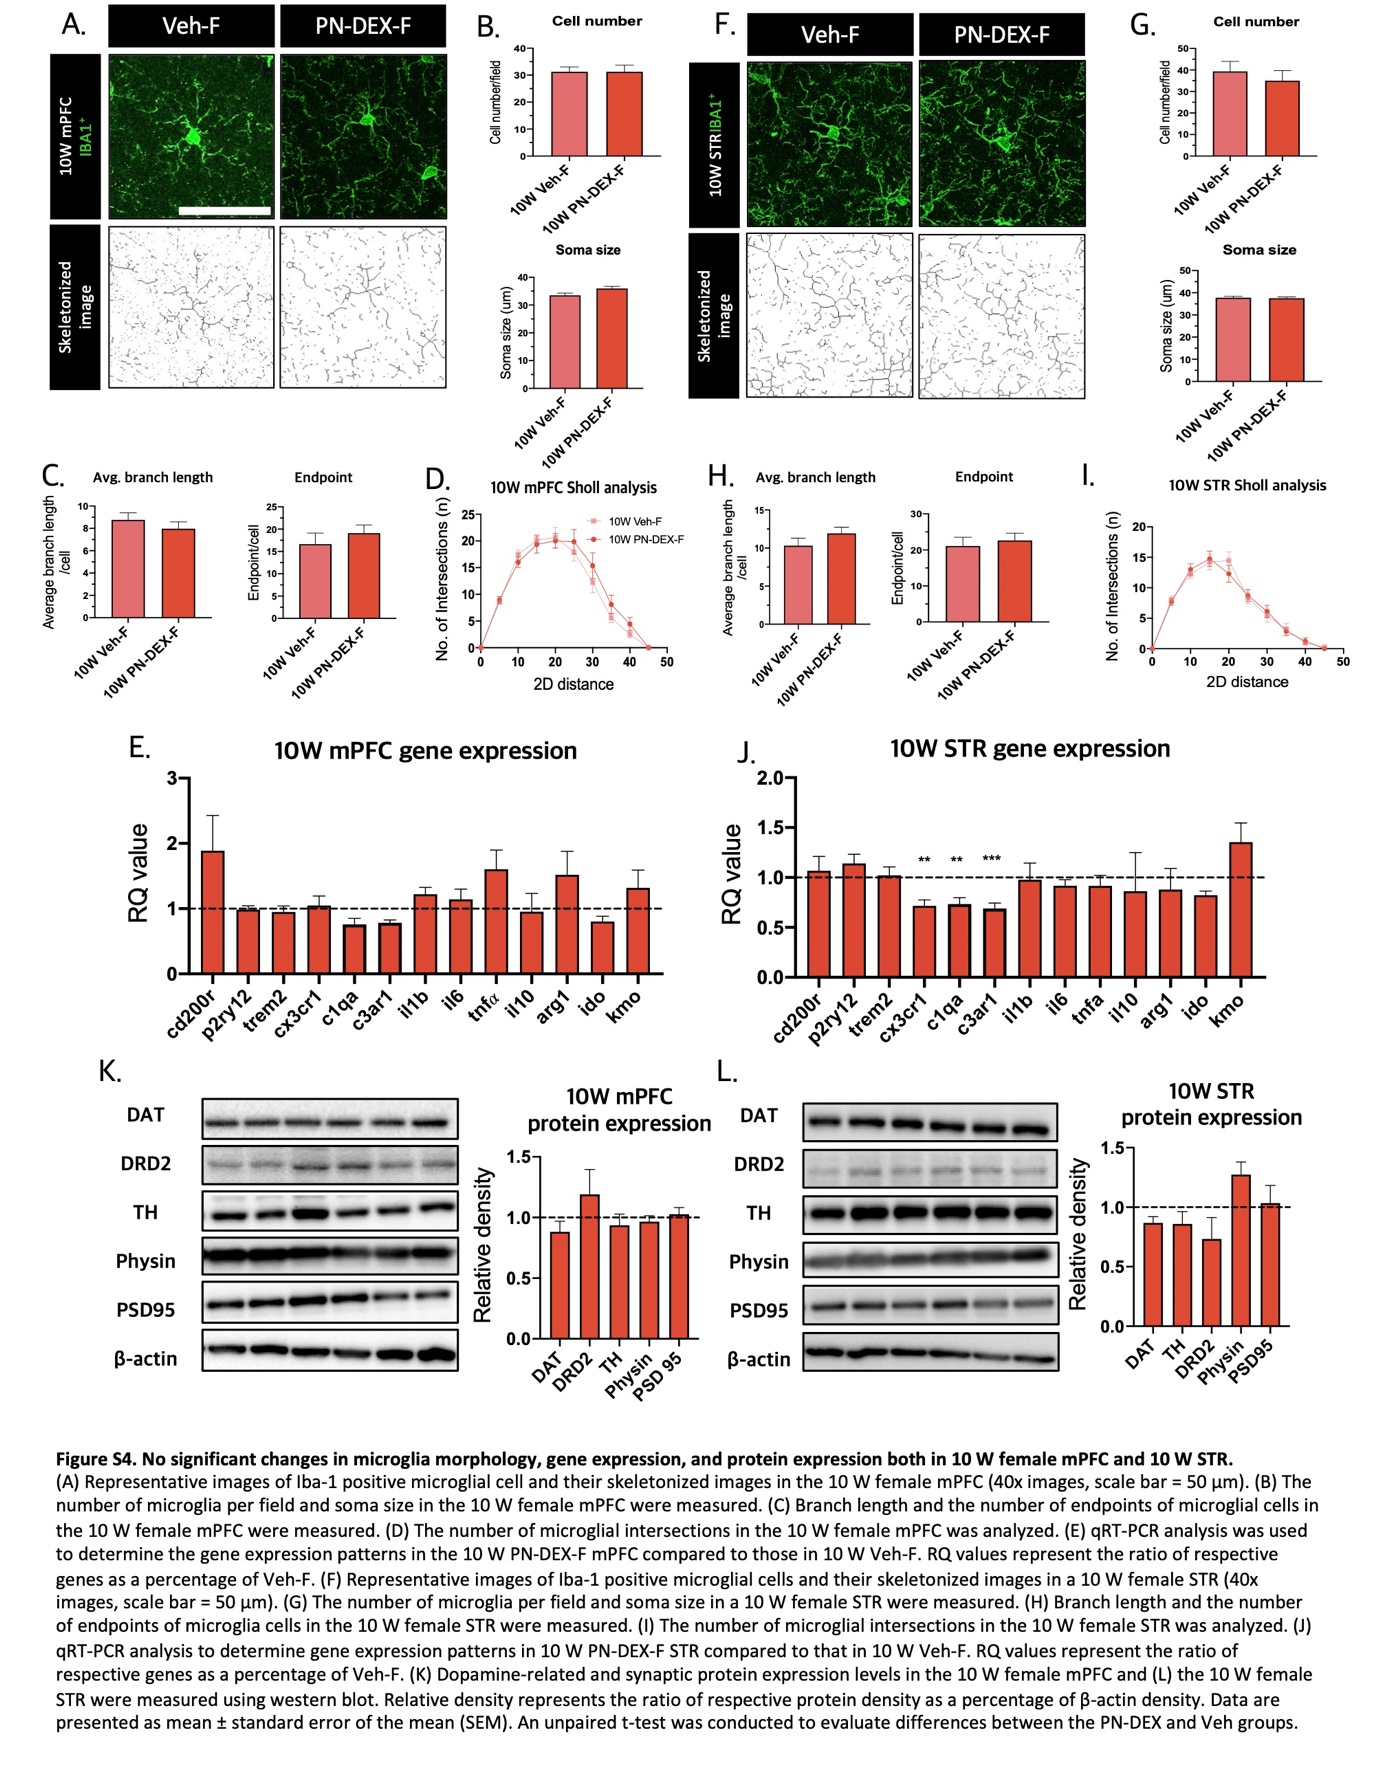


**Supplementary figure 4.** **No significant changes in microglia morphology, gene expression, and protein expression both in 10 W female mPFC and 10 W STR.**

(A) Representative images of Iba-1 positive microglial cell and their skeletonized images in the 10 W female mPFC (40x images, scale bar = 50 µm). (B) The number of microglia per field and soma size in the 10 W female mPFC were measured. (C) Branch length and the number of endpoints of microglial cells in the 10 W female mPFC were measured. (D) The number of microglial intersections in the 10 W female mPFC was analyzed. (E) qRT-PCR analysis was used to determine the gene expression patterns in the 10 W PN-DEX-F mPFC compared to those in 10 W Veh-F. RQ values represent the ratio of respective genes as a percentage of Veh-F. (F) Representative images of Iba-1 positive microglial cells and their skeletonized images in a 10 W female STR (40x images, scale bar = 50 µm). (G) The number of microglia per field and soma size in a 10 W female STR were measured. (H) Branch length and the number of endpoints of microglia cells in the 10 W female STR were measured. (I) The number of microglial intersections in the 10 W female STR was analyzed. (J) qRT-PCR analysis to determine gene expression patterns in 10 W PN-DEX-F STR compared to that in 10 W Veh-F. RQ values represent the ratio of respective genes as a percentage of Veh-F. (K) Dopamine-related and synaptic protein expression levels in the 10 W female mPFC and (L) the 10 W female STR were measured using western blot. Relative density represents the ratio of respective protein density as a percentage of β-actin density. Data are presented as mean ± standard error of the mean (SEM). An unpaired t-test was conducted to evaluate differences between the PN-DEX and Veh groups.


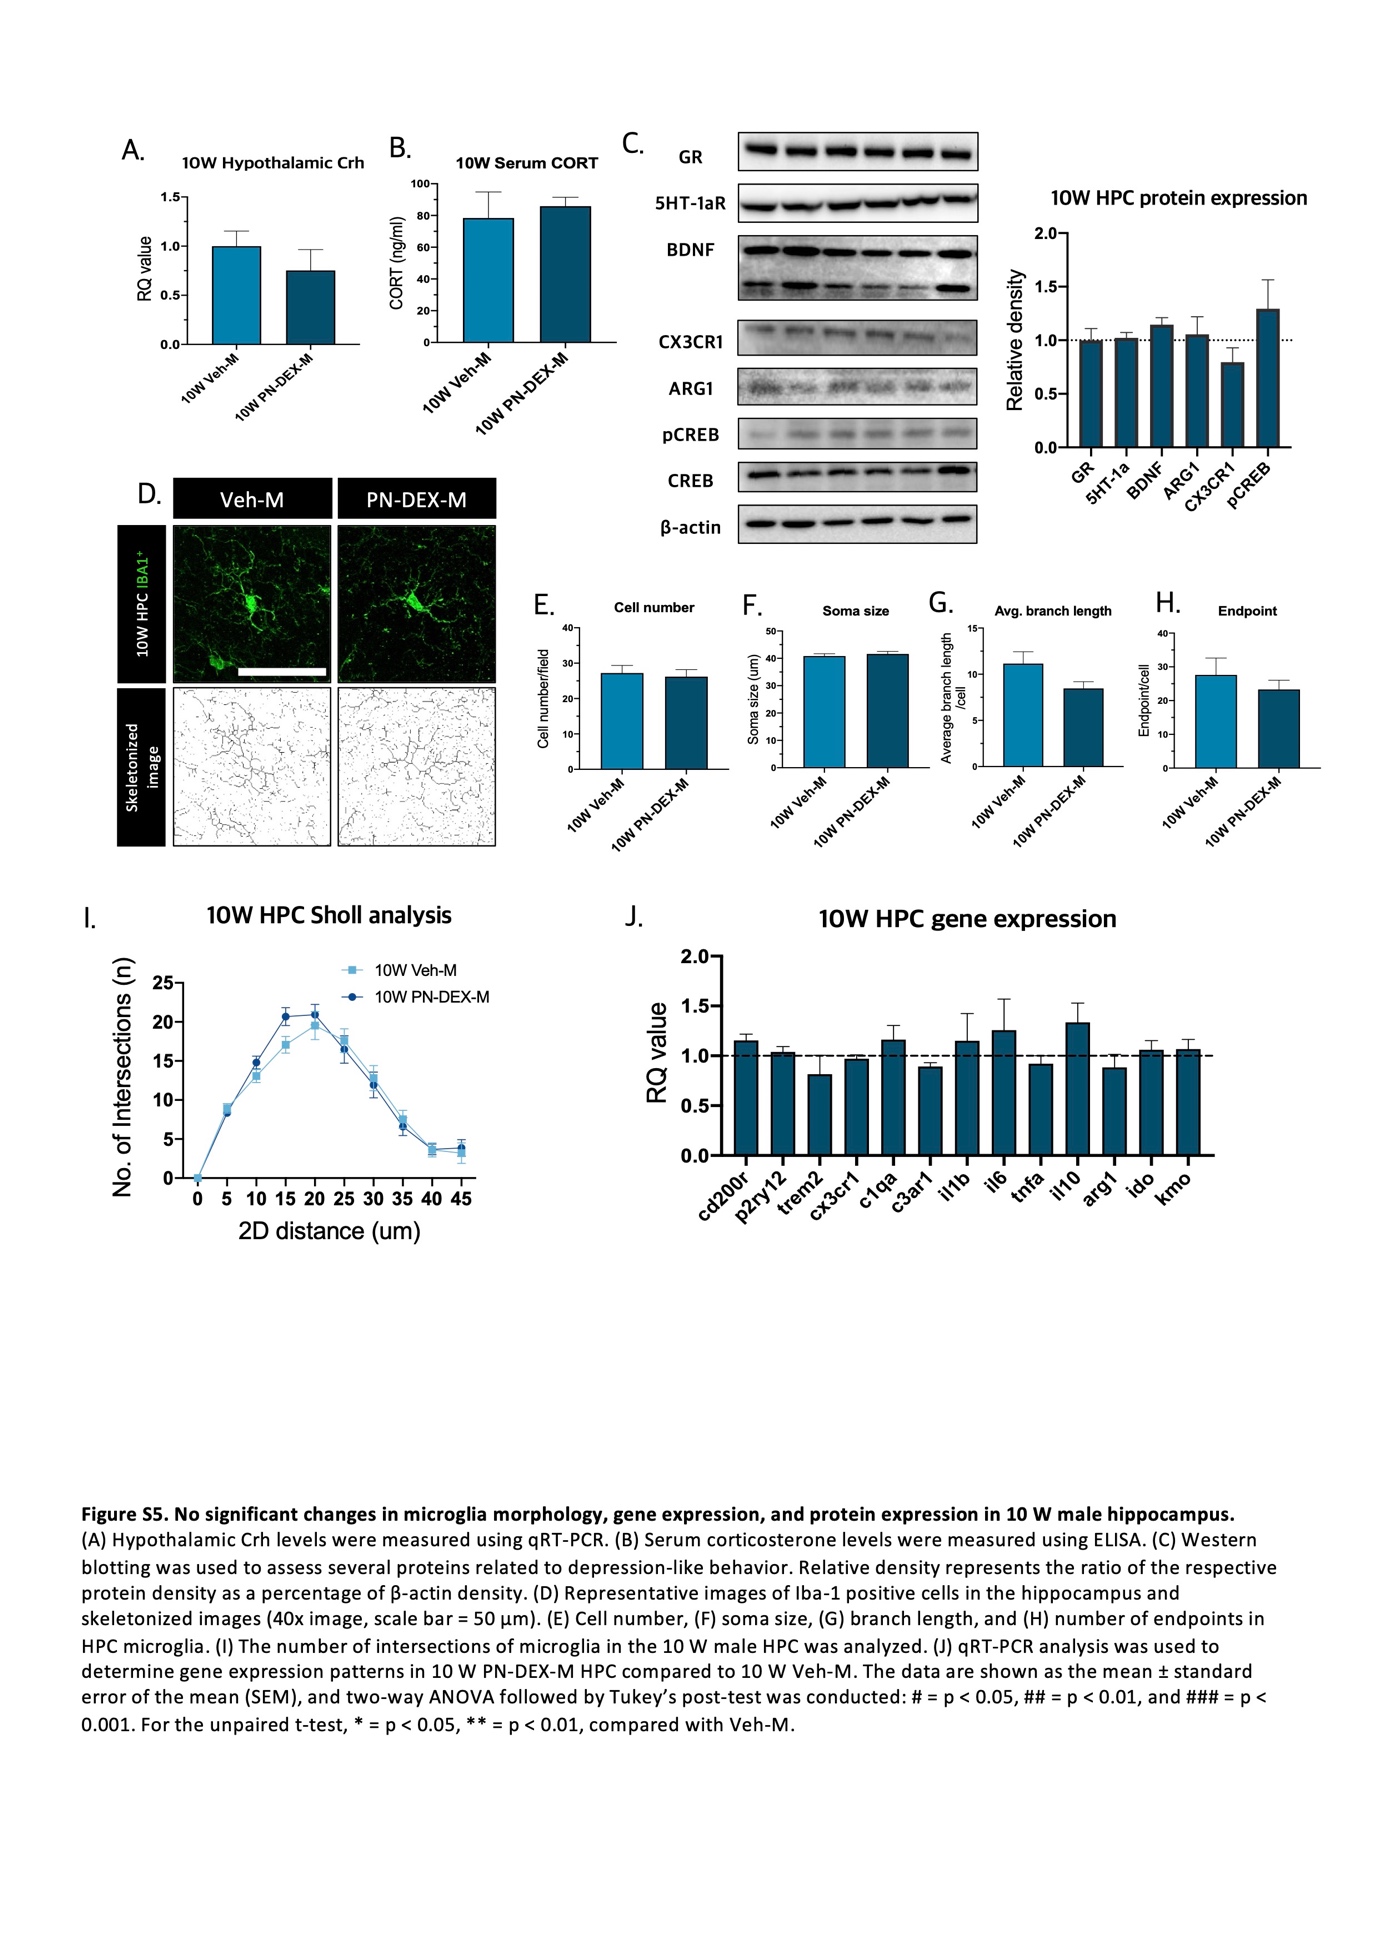


**Supplementary figure 5.** **No significant changes in microglia morphology, gene expression, and protein expression in 10 W male hippocampus.**

(A) Hypothalamic Crh levels were measured using qRT-PCR. (B) Serum corticosterone levels were measured using ELISA. (C) Western blotting was used to assess several proteins related to depression-like behavior. Relative density represents the ratio of the respective protein density as a percentage of β-actin density. (D) Representative images of Iba-1 positive cells in the hippocampus and skeletonized images (40x image, scale bar = 50 µm). (E) Cell number, (F) soma size, (G) branch length, and (H) number of endpoints in HPC microglia. (I) The number of intersections of microglia in the 10 W male HPC was analyzed. (J) qRT-PCR analysis was used to determine gene expression patterns in 10 W PN-DEX-M HPC compared to 10 W Veh-M. The data are shown as the mean ± standard error of the mean (SEM), and two-way ANOVA followed by Tukey’s post-test was conducted: # = p < 0.05, ## = p < 0.01, and ### = p < 0.001. For the unpaired t-test, * = p < 0.05, ** = p < 0.01, compared with Veh-M.
